# Supplementary material for: The Interplay Between Premenstrual Syndrome, Eating Disorder Risk, and Adiposity Indicators: A Cross Sectional Study on Women
Source: Research Square preprint supplement (doi:10.21203/rs.3.rs-8246542/v1), 2025-12-22
Supplement: Supplementary file 1 [file 38ca44a490193a399f105e71.docx]

**Supplementary Metarial**

Table. Energy and nutrient consumption according to the presence of premenstrual status

| **Variables** | **PMS Group (n=146)** | **Non-PMS Group (n=106)** | ***p -*Value** |
| --- | --- | --- | --- |
| Energy (kcal) | 1323,6(209-4045) | 1240,6(418,6-3216,9) | 0,172** |
| CHO (g) | 132(21,1-97,77) | 123,3(33,7-369,39) | 0,663** |
| CHO % TE | 39,24±9,45 | 40,2±7,95 | 0,372* |
| Protein (g) | 56,4±17,79 | 56,8±18,92 | 0,427* |
| Protein % TE | 17,13(6,19-29) | 16,68(7-31,9) | 0,132** |
| Fat (g) | 60,65(6,8-156,5) | 55,7(21-142,7) | 0,132** |
| Fat % TE | 41,8±11,6 | 40,9±7,45) | 0,344* |
| Fiber (g) | 18,85(4,8-48,1) | 17,45(2,7-50,6) | 0,113** |
| Cholesterol (mg) | 292,9(10,2-793,1) | 293,1(158,2-386,5) | 0,843** |
| Vitamin A (µg) | 955,9(37,5-2909,5) | 924,3(154,7-37675) | 0,596** |
| Vitamine E (mg) | 8,9(1-28) | 8,3(2,1-58) | 0,281** |
| Vitamine B1 (mg) | 0,7(0,2-4,8) | 0,7(0,2-1,7) | 0,05** |
| Vitamine B2 (mg) | 1,1(0,2-2,1) | 1(0,3-6,3) | 0,621** |
| Vitamine B6 (mg) | 1,1(0,3-2,9) | 1(0,3-2,3) | 0,101** |
| Folate (µg) | 243,7(52,5-562) | 249,15(71,4-700,7) | 0,206** |
| Vitamine C (mg) | 67,75(3,2-311,7) | 13,85(3,5-368,9) | 0,871** |
| Sodium (mg) | 2368,95(245,5-5948,2) | 2514,25(315-5395,6) | 0,869** |
| Potassium (mg) | 2263(632,5-4854,8) | 2094,8(98-4356,2) | 0,088** |
| Calcium (mg) | 668,93±284,74 | 656,29±281,07 | 0,170* |
| Magnessium (mg) | 228,7(50-651,5) | 206,4(63,7-591,6) | 0,086** |
| Phosphor (mg) | 961,86±324,38 | 988,91±327,24 | 0,891* |
| Iron (mg) | 8,5(2,3-22) | 8,15(2,8-21,5) | 0,307** |
| Zinc (mg) | 8,1(2,6-18) | 7,75(2,5-21,2) | 0,521** |

Data are presented as Mean ± Standard Deviation, Median (Minimum-Maximum).

Abbreviations: CHO: Carbohydrates, TE: Total Energy, PMS: Premenstrual Syndrome.
Statistical Analysis: *Student t-test, **Mann-Whitney U test, ***Kruskal-Wallis H, +Pearson Chi-square test was used.
p<0.05 was considered statistically significant.
